# Supplementary material for: Graphite-like C3N4 hybridized ZnWO4 nanorods: Synthesis and its enhanced photocatalysis in visible light
Source: Royal Society of Chemistry journal article supplement (doi:10.1039/c2ce25517k), 2012-01-01
Supplement: c2ce25517k.pdf [file c2ce25517k.pdf]

## Supporting Information

### Graphite-like $C_3N_4$ hybridized $ZnWO_4$ nanorods: Synthesis and its enhanced photocatalysis at visible light

By Yajun Wang, Zhenxing Wang, Safdar Muhammad, and Jun He\*

[\*] National Center for Nanoscience and Technology,  
Beijing 100190, P. R. China. Fax: 86-10-62656765; Tel: 86-10-82545670;  
E-mail: [hej@nanoctr.cn](mailto:hej@nanoctr.cn)

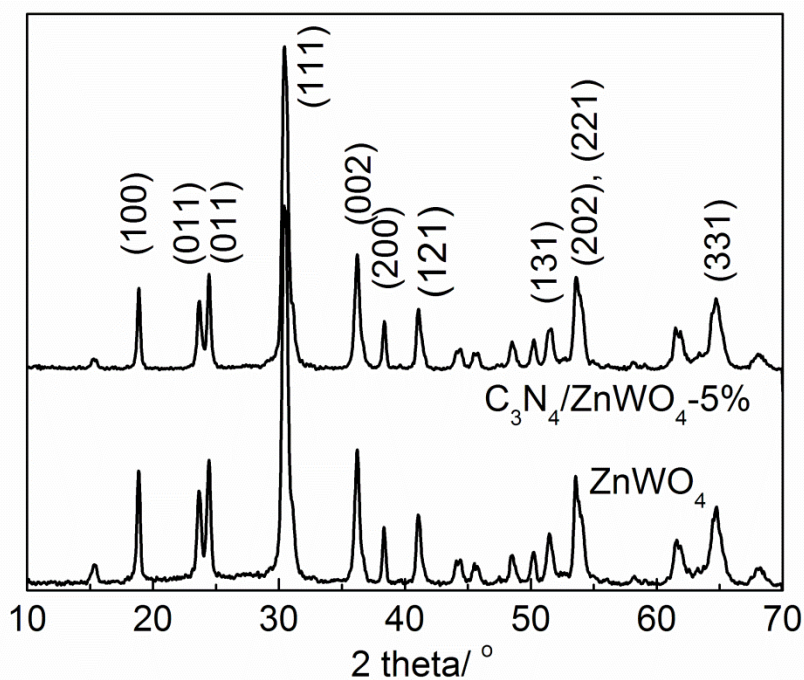

Figure S1 XRD patterns for  $ZnWO_4$  and  $C_3N_4/ZnWO_4$  photocatalysts

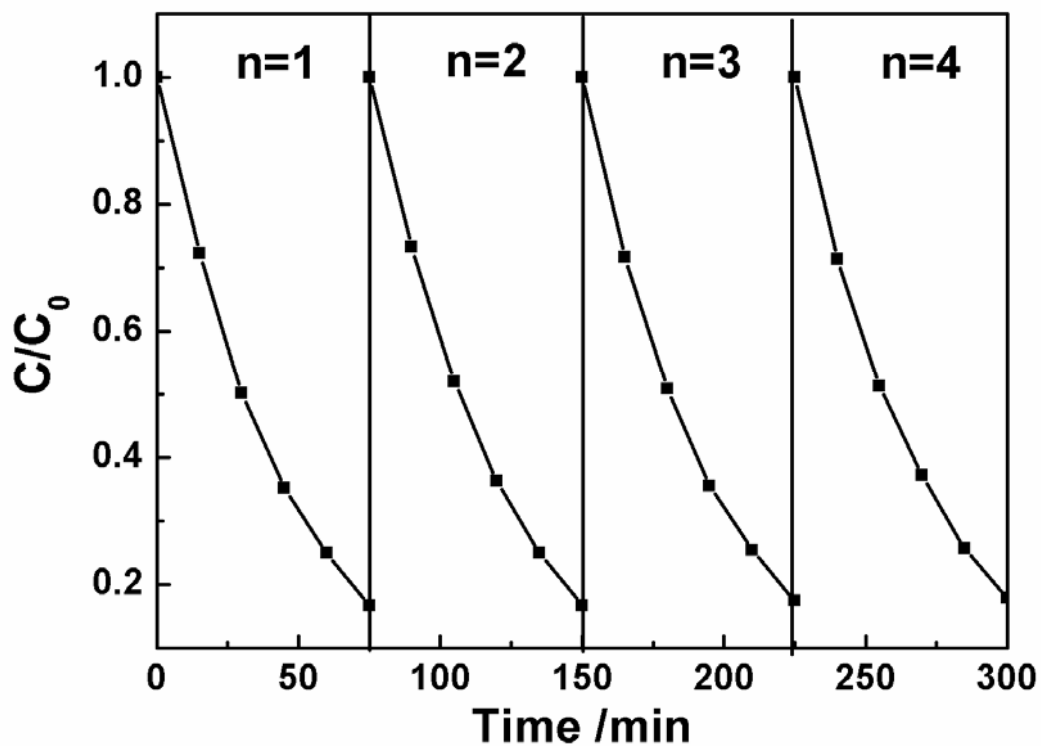

Figure S2 Cycling runs in the photocatalytic degradation of MB in the presence of  $C_3N_4/ZnWO_4$ -5% ( $\lambda = 254$  nm)

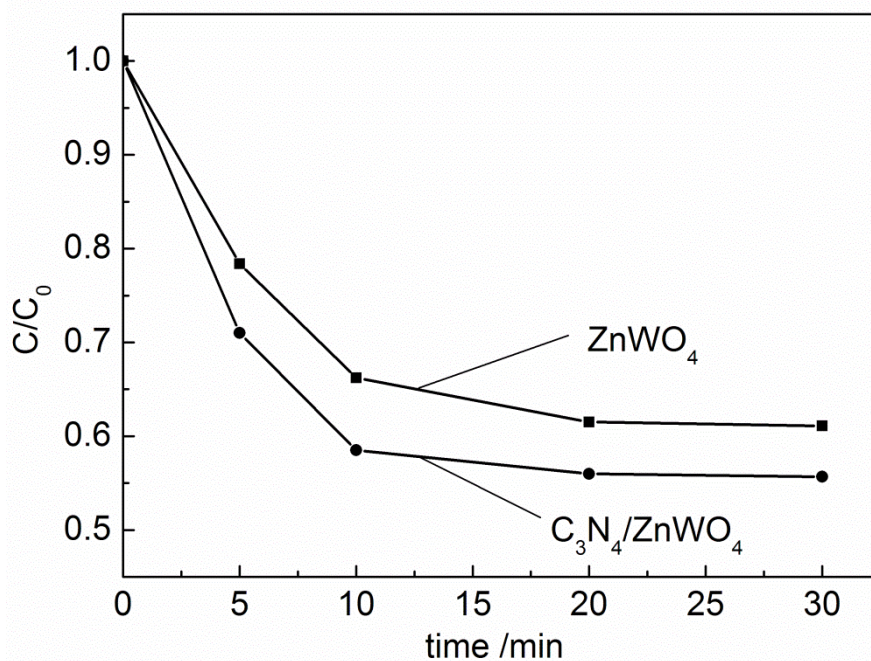

Figure S3 Changes in MB concentration in  $ZnWO_4$  and  $C_3N_4/ZnWO_4$ -5% photocatalytic system in dark.
